# Supplementary material for: Exposure to Greenness and Mortality in a Nationwide Prospective Cohort Study of Women
Source: PubMed Central journal article supplement (PMC5010419; doi:10.1289/ehp.1510363), 2016-04-14
Supplement: ehp.1510363.s001.acco.pdf [file ehp.1510363.s001.acco.pdf]

**Note to readers with disabilities:** *EHP* strives to ensure that all journal content is accessible to all readers. However, some figures and Supplemental Material published in *EHP* articles may not conform to [508 standards](#) due to the complexity of the information being presented. If you need assistance accessing journal content, please contact [ehp508@niehs.nih.gov](mailto:ehp508@niehs.nih.gov). Our staff will work with you to assess and meet your accessibility needs within 3 working days.

## **Supplemental Material**

### **Exposure to Greenness and Mortality in a Nationwide Prospective Cohort Study of Women**

Peter James, Jaime E. Hart, Rachel F. Banay, and Francine Laden

#### **Table of Contents**

**Table S1.** Estimated proportion of association between greenness and mortality in the Nurses' Health Study explained by physical activity, air pollution exposure, social engagement, and mental health

**Figure S1.** Hazard ratios and 95% confidence intervals for a 0.1 unit increase in cumulative average NDVI at the 250m buffer and all-cause non-accidental mortality in the Nurses' Health Study (N=108,630) stratified by a) Race/Ethnicity, b) Census region, c) Census tract median home value, d) PM<sub>2.5</sub> quintiles, e) Weight status, and f) Whether a participant moved over follow-up. Hazard ratios are adjusted for age and calendar year, race/ethnicity, smoking status, pack-years smoked, parental occupation, RN degree, marital status, husband's highest education, Census tract median home value, and Census tract median income, except when stratifying variable

**Table S1. Estimated proportion of association between greenness and mortality in the Nurses' Health Study explained by physical activity, air pollution exposure, social engagement, and mental health<sup>a, b</sup>**

| Mediator                                                               | Proportion of Association between Cumulative Average Greenness in 250m Buffer and Mortality Explained by Mediator (95% CI) |                                       |                                       |
|------------------------------------------------------------------------|----------------------------------------------------------------------------------------------------------------------------|---------------------------------------|---------------------------------------|
|                                                                        | Cancer Mortality                                                                                                           | Respiratory Mortality                 | Kidney-Disease Mortality              |
| <b>Total Physical Activity (metabolic equivalent of task-hrs/week)</b> | 2.5% (0.7%, 9.1%)                                                                                                          | Too small to calculate reliably (<1%) | Too small to calculate reliably (<1%) |
| <b>Air Pollution (Modeled PM<sub>2.5</sub>)</b>                        | 3.1% (1.3%, 6.9%)                                                                                                          | 2.1% (1.2%, 3.7%)                     | 7.2% (2.5%, 18.9%)                    |
| <b>Social Engagement (Participate in Groups &gt;1 per week)</b>        | 9.7% (4.2%, 21.1%)                                                                                                         | 4.9% (2.0%, 11.8%)                    | 6.7% (2.4%, 17.3%)                    |
| <b>Mental Health (Doctor-Diagnosed or Antidepressant Use)</b>          | 19.9% (8.2%, 40.7%)                                                                                                        | 6.3% (2.1%, 17.1%)                    | 9.6% (3.4%, 24.6%)                    |
| <b>All Mediators Combined</b>                                          | 15.3% (6.6%, 31.5%)                                                                                                        | 7.0% (3.1%, 14.9%)                    | 11.2% (4.1%, 27.3%)                   |

<sup>a</sup> Analyses adjusted for age and calendar year, race/ethnicity, smoking status, pack-years smoked, parental occupation, RN degree, marital status, husband's highest education, Census tract median home value, and Census tract median income

<sup>b</sup> Mediation analyses assume that there is no unmeasured exposure–outcome confounding; no unmeasured mediator–outcome confounding; no unmeasured exposure–mediator confounding; and no mediator–outcome confounder affected by exposure.

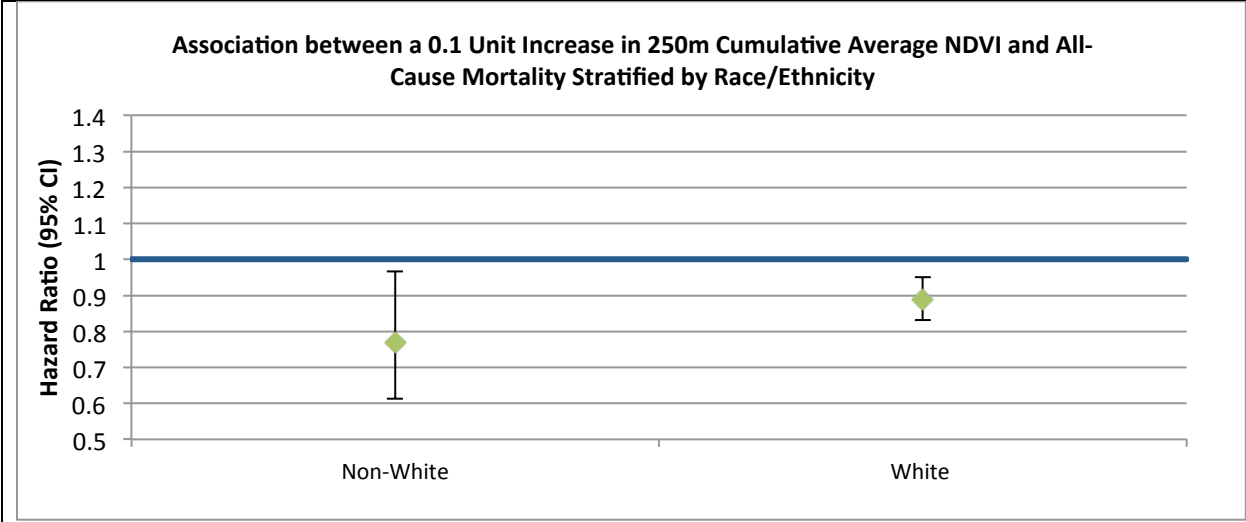

a) P for interaction: 0.23

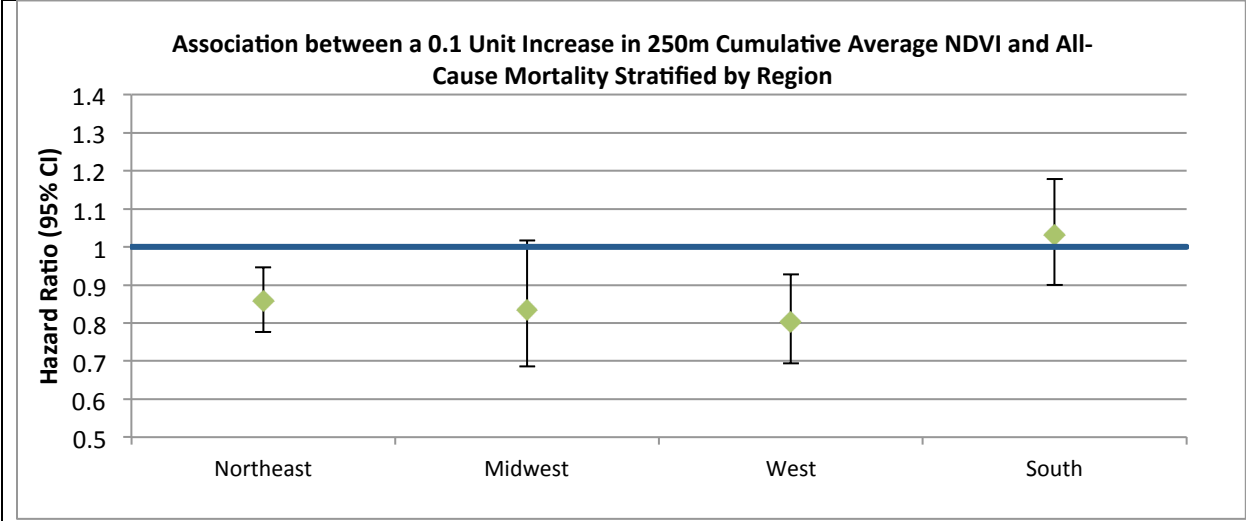

b) P for interaction: 0.061

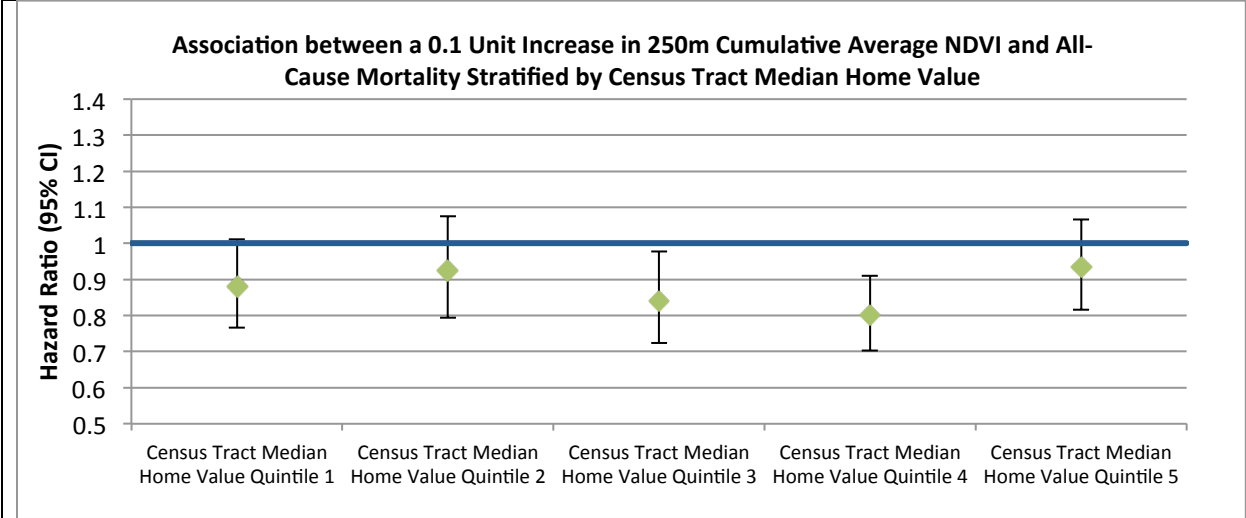

c) P for interaction: 0.61

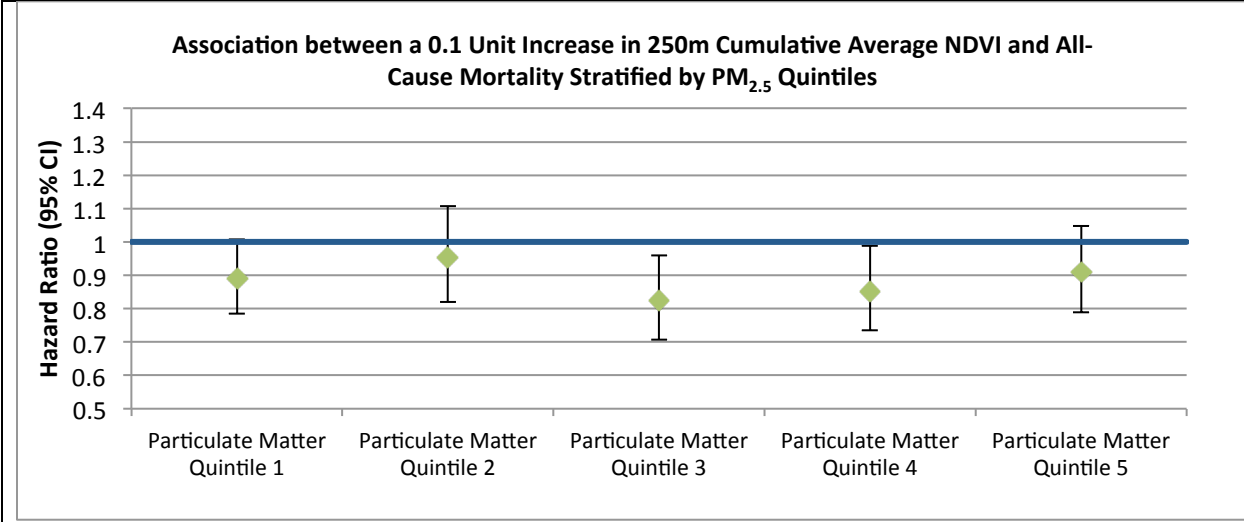

d) P for interaction: 0.69

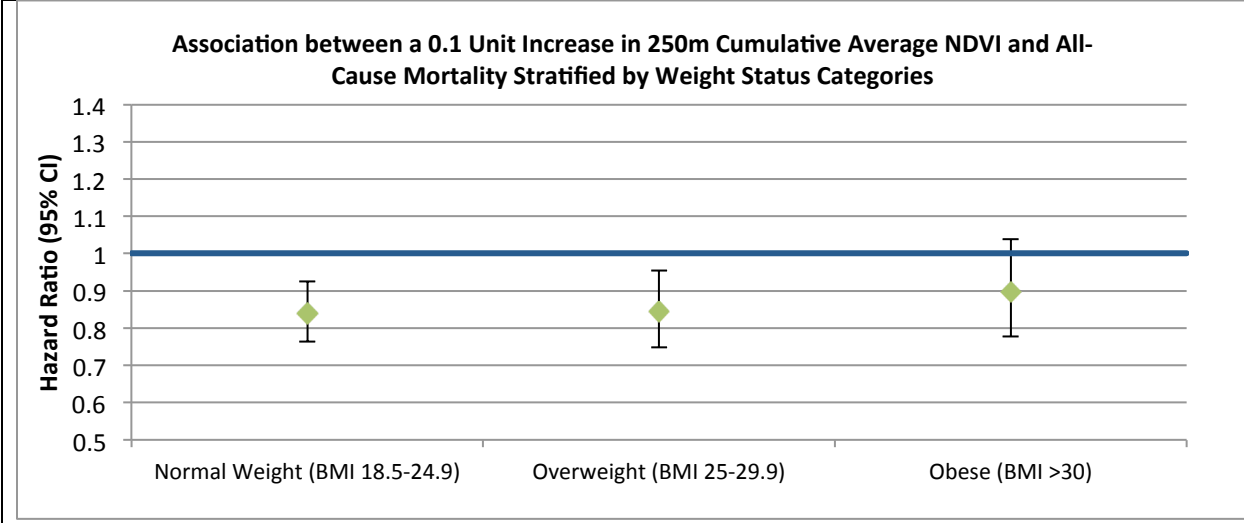

e) P for interaction: 0.73

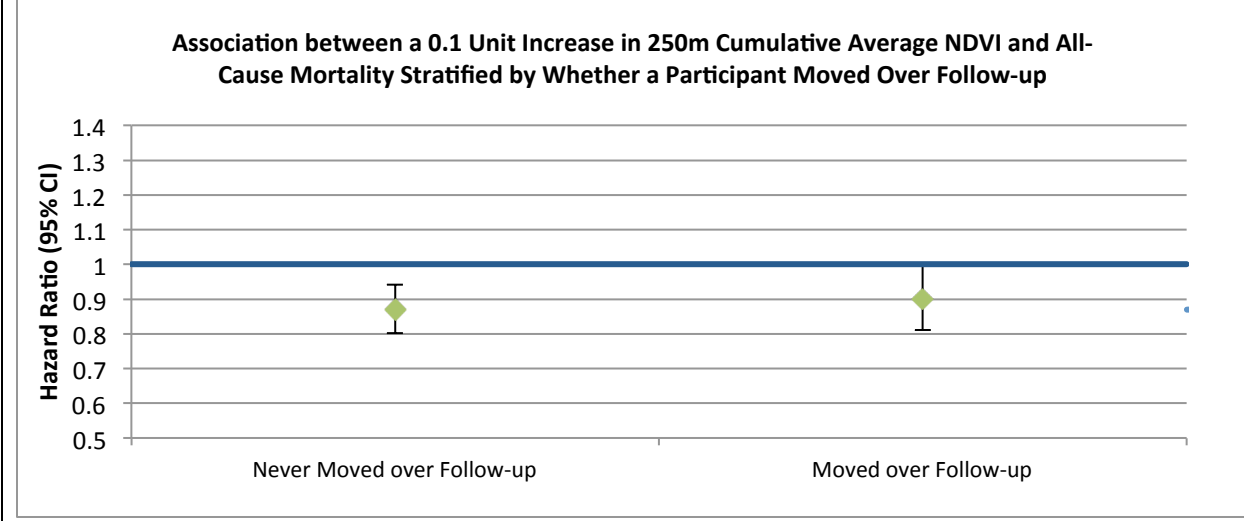

f) P for interaction: 0.59

**Figure S1.** Hazard ratios and 95% confidence intervals for a 0.1 unit increase in cumulative average NDVI at the 250m buffer and all-cause non-accidental mortality in the Nurses' Health Study (N=108,630) stratified by a) Race/Ethnicity, b) Census region, c) Census tract median home value, d) PM<sub>2.5</sub> quintiles, e) Weight status, and f) Whether a participant moved over follow-up. Hazard ratios are adjusted for age and calendar year, race/ethnicity, smoking status, pack-years smoked, parental occupation, RN degree, marital status, husband's highest education, Census tract median home value, and Census tract median income, except when stratifying variable
